# Supplementary material for: Syntheses of Cannabinoid Metabolites: Ajulemic Acid and HU-210
Source: MDPI journal article supplement (doi:10.3390/molecules29020526), 2024-01-21
Supplement: s1 [file s1]

## Synthesis of cannabinoid metabolites: ajulemic acid and HU-210

Wenbin Shao<sup>1,2</sup>, Pingyong Liao<sup>1,2</sup>, Xiaoyan Zhang<sup>3</sup>, Binbin Fan<sup>3</sup>, Ruijia Chen<sup>1,2</sup>, Xilong Chen<sup>1,2</sup>,  
Xuejun Zhao<sup>1,2,\*</sup>, Wenbin Liu<sup>1,2,\*</sup>

<sup>1</sup> Shanghai Key Laboratory of Crime Scene Evidence, Shanghai Research Institute of Criminal Science and Technology,  
Shanghai 200072, China

<sup>2</sup> Shanghai Yuansi Standard Science and Technology Co., Ltd, Shanghai, 200072, China

<sup>3</sup> State Key Laboratory of Bio-Fibers and Eco-Textiles & Institute of Marine Biobased Materials & Collage of Materials  
Science and Engineering, Qingdao University, Qingdao 266071, China

\* Correspondence: wblu1981@163.com (W.L.); xjzhao1201@163.com (X.Z.)

### Table of contents

**Figure S1-S2. NMR spectra of intermediate 5.**

**Figure S3-S4. NMR spectra of intermediate 6.**

**Figure S5-S6. NMR spectra of intermediate 7.**

**Figure S7-S8. NMR spectra of intermediate 8.**

**Figure S9-S10. NMR spectra of intermediate 10.**

**Figure S11-S12. NMR spectra of intermediate 11.**

**Figure S13-S14. NMR spectra of intermediate 12.**

**Figure S15-S16. NMR spectra of intermediate 14.**

**Figure S17. <sup>1</sup>HNMR spectra of intermediate 15.**

**Figure S18-S19. NMR spectra of intermediate 3.**

**Figure S20-S21. NMR spectra of intermediate 9.**

**Figure S22-S23. NMR spectra of intermediate 4.**

**Figure S24-S25. NMR spectra of intermediate  $\Delta^8$ -THC.**

**Figure S26-S27. NMR spectra of intermediate 11-Nor- $\Delta^8$ -THC-carboxylic acid.**

**Figure S28-S29. NMR spectra of intermediate  $\Delta^9$ -THC.**

**Figure S30-S31. NMR spectra of intermediate  $\Delta^9$ -THC- carboxylic acid.**

NMR spectra for the synthesized compounds

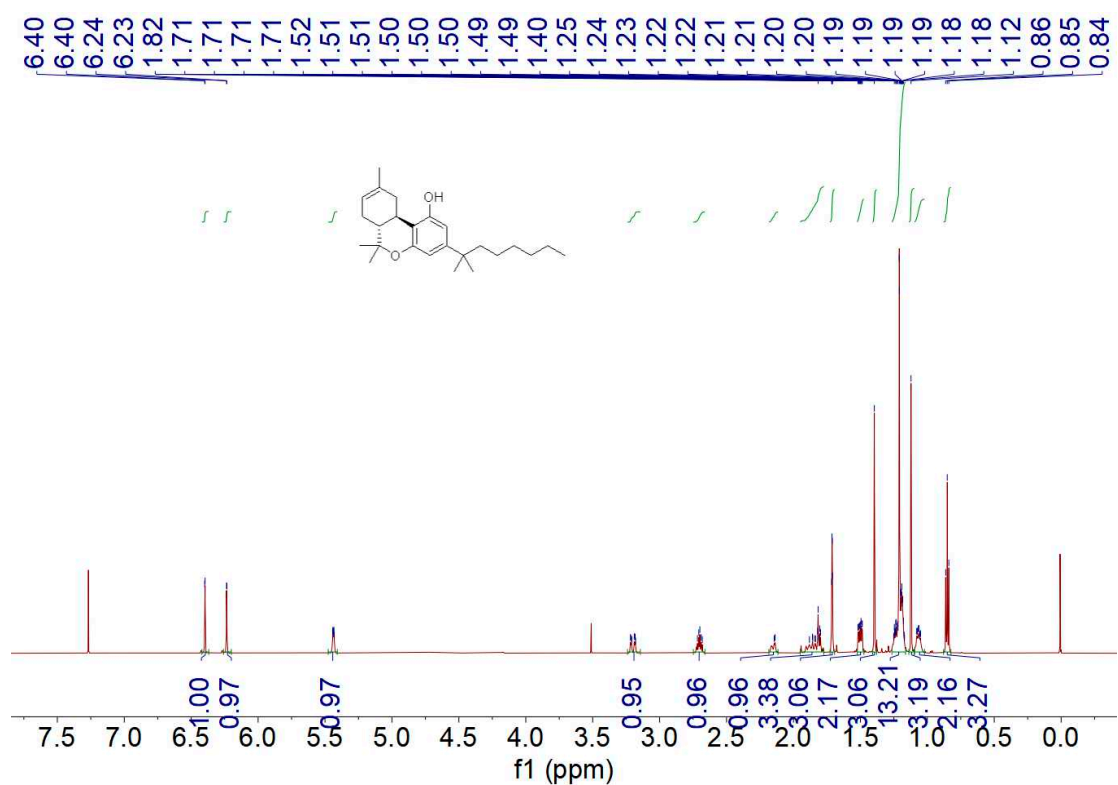

Figure S1 <sup>1</sup>H-NMR of compound **5** (CDCl<sub>3</sub>)

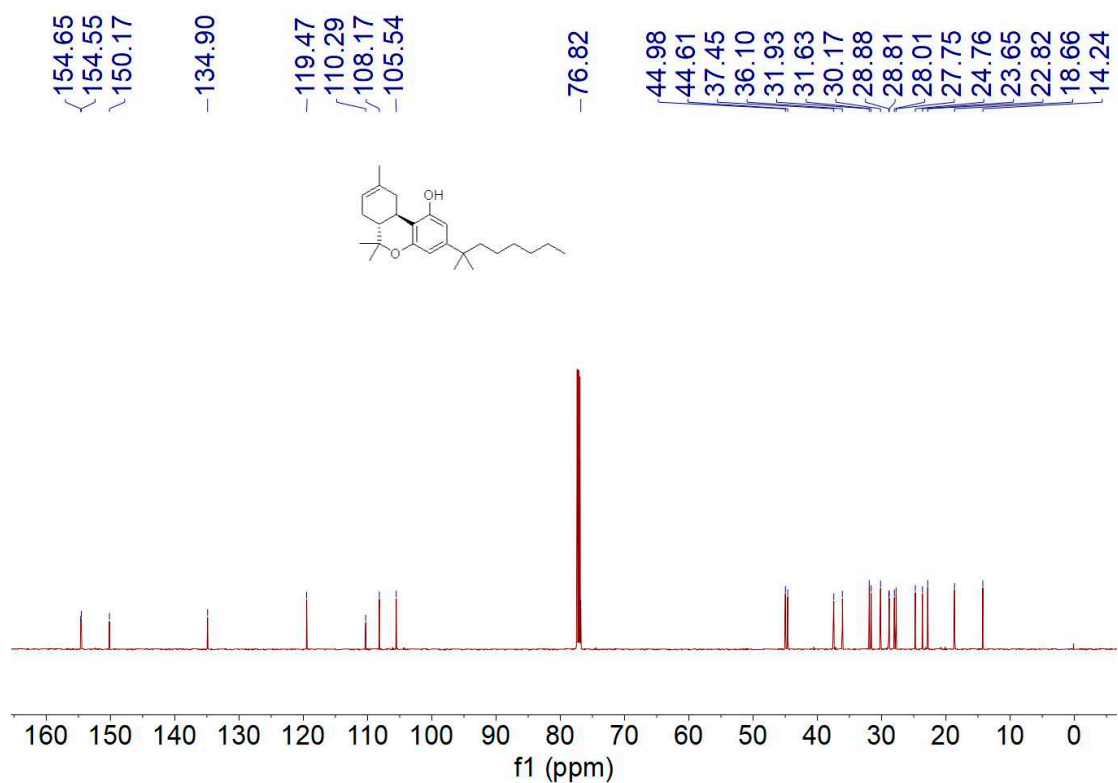

Figure S2 <sup>13</sup>C-NMR of compound **5** (CDCl<sub>3</sub>)

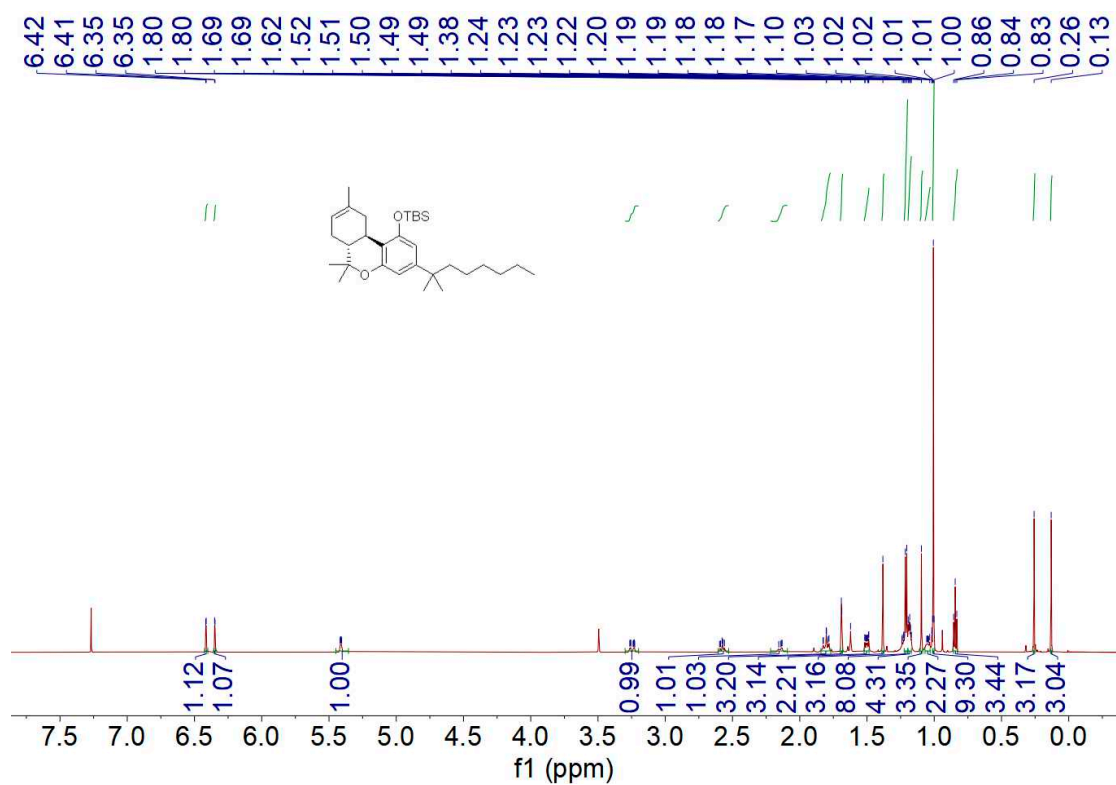

**Figure S3** <sup>1</sup>H-NMR of compound **6** (CDCl<sub>3</sub>)

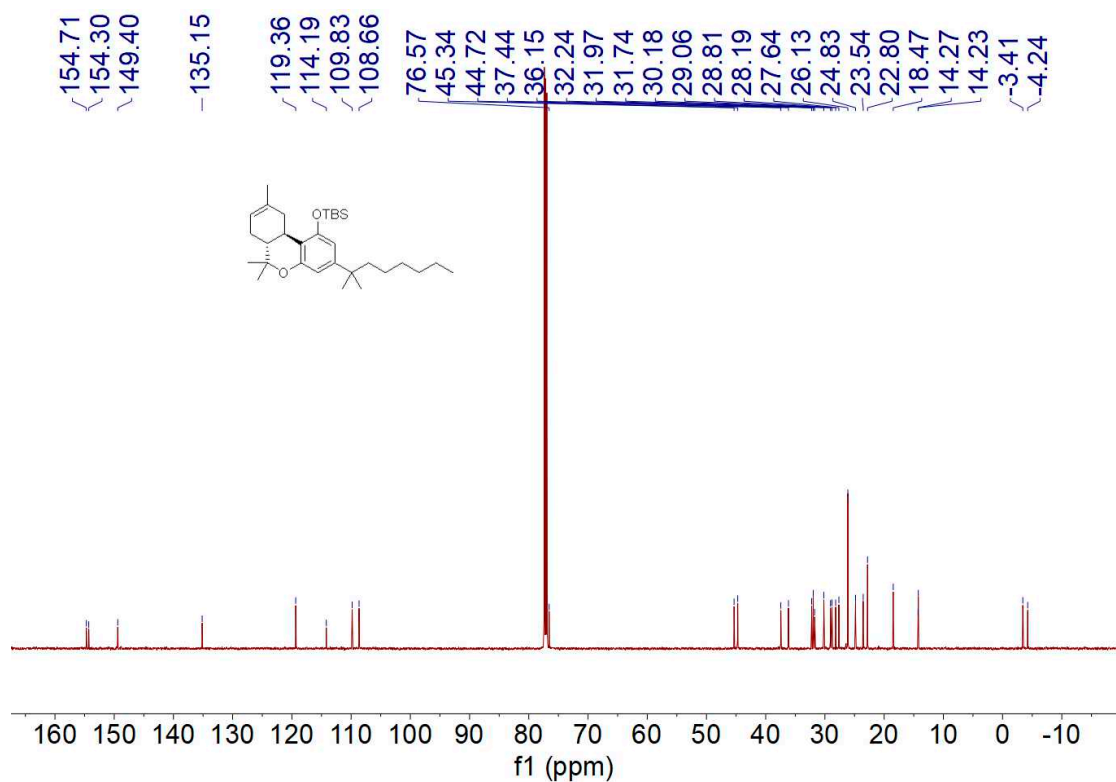

**Figure S4** <sup>13</sup>C-NMR of compound **6** (CDCl<sub>3</sub>)

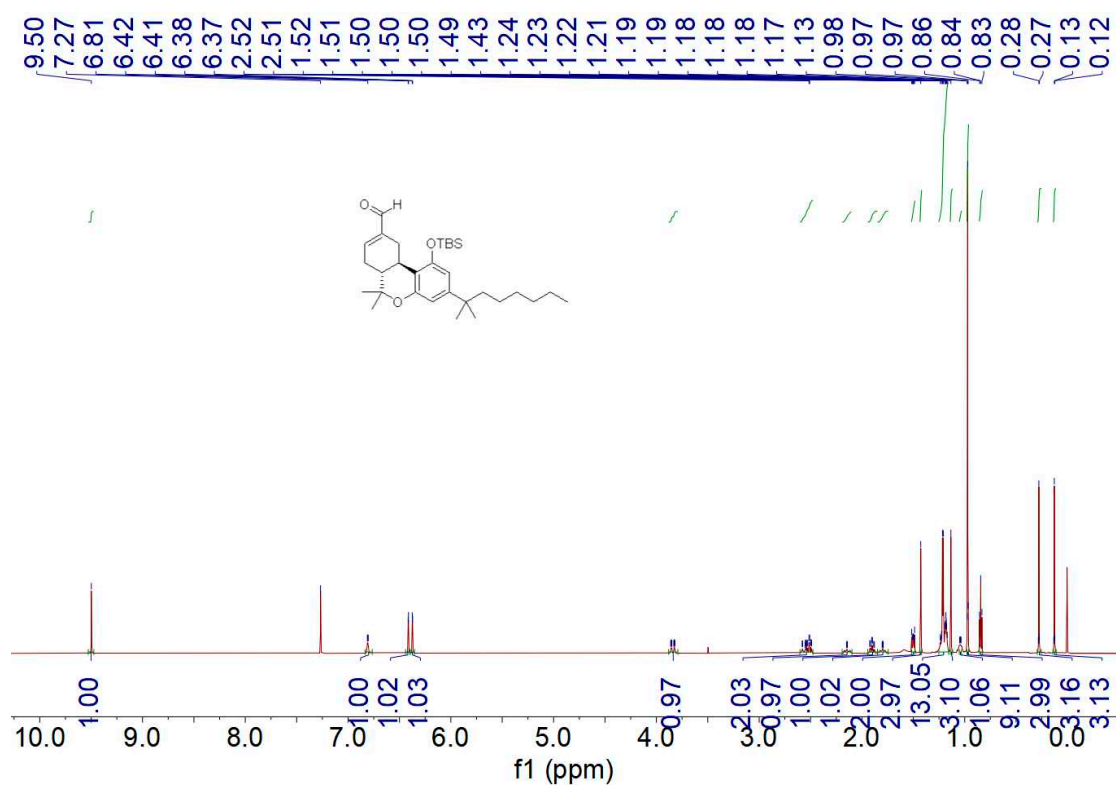

Figure S5 <sup>1</sup>H-NMR of compound 7 (CDCl<sub>3</sub>)

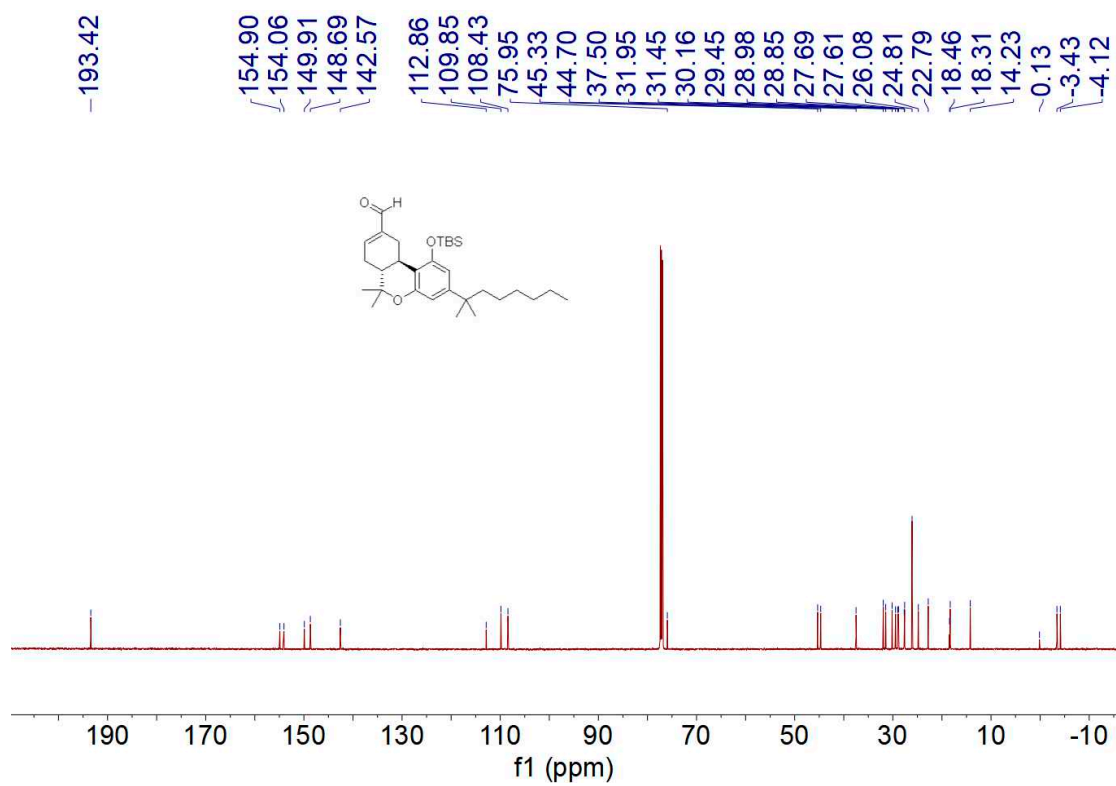

Figure S6 <sup>13</sup>C-NMR of compound 7 (CDCl<sub>3</sub>)



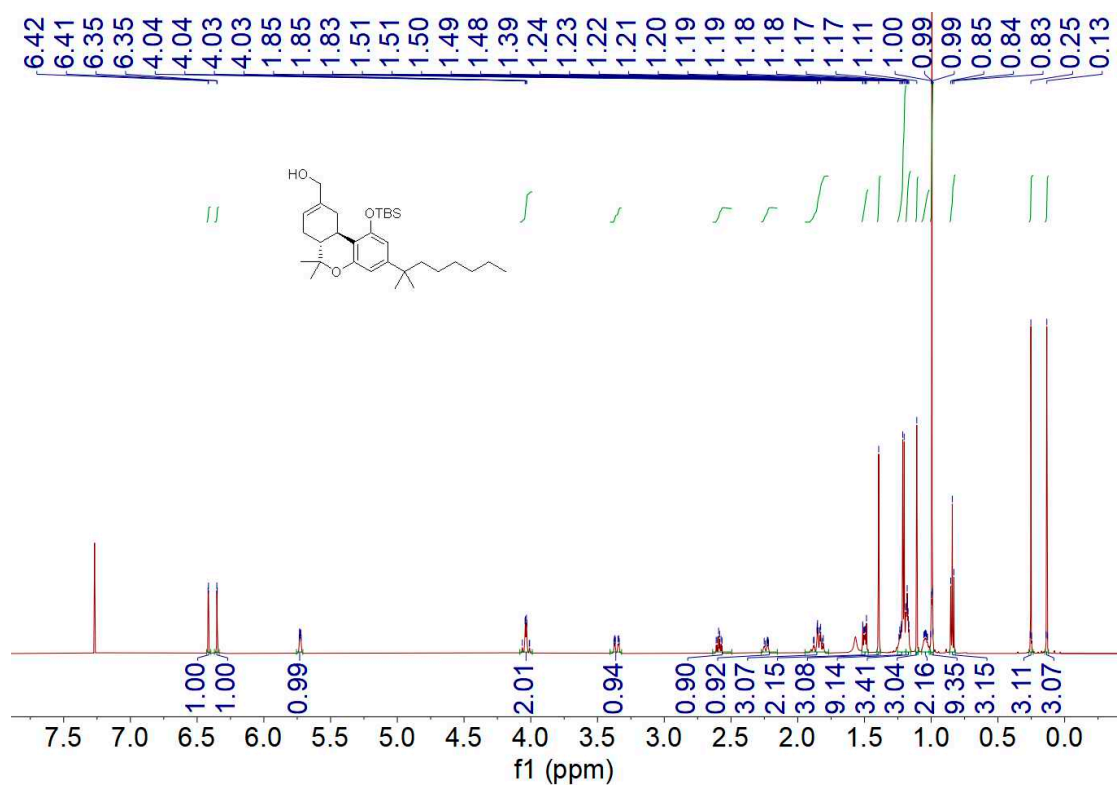

Figure S7 <sup>1</sup>H-NMR of compound 8 (CDCl<sub>3</sub>)

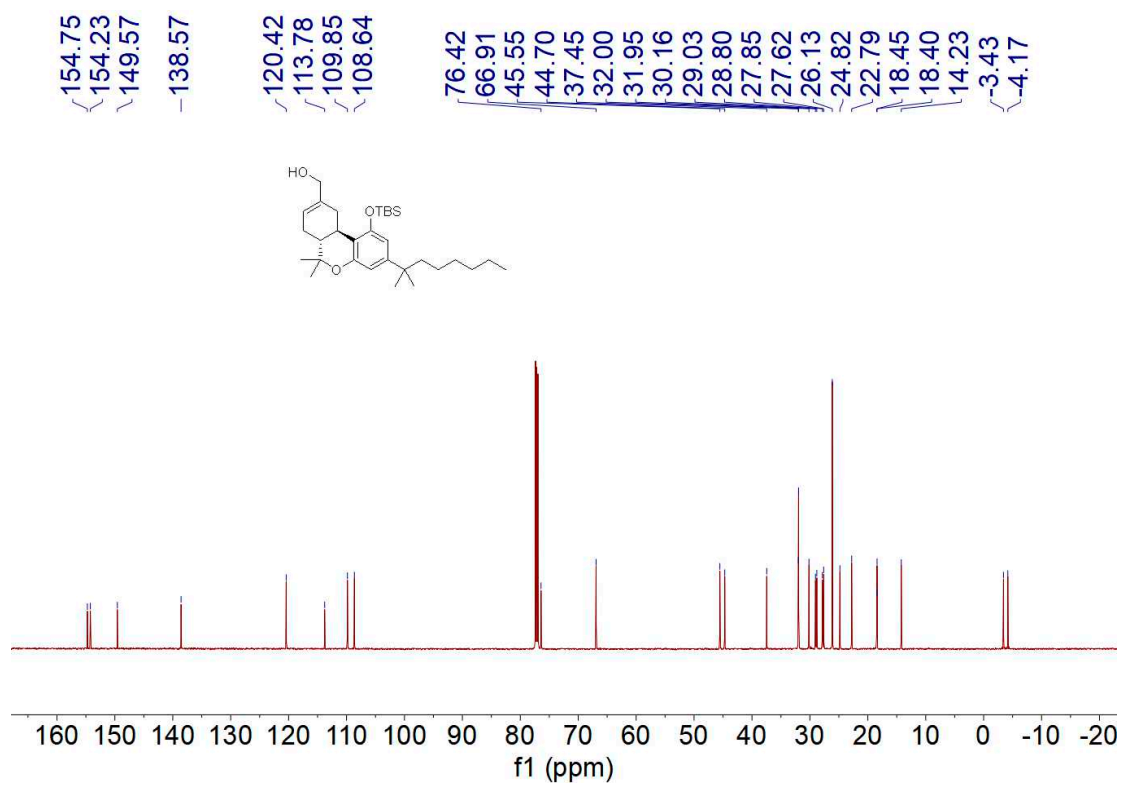

Figure S8 <sup>13</sup>C-NMR of compound 8 (CDCl<sub>3</sub>)

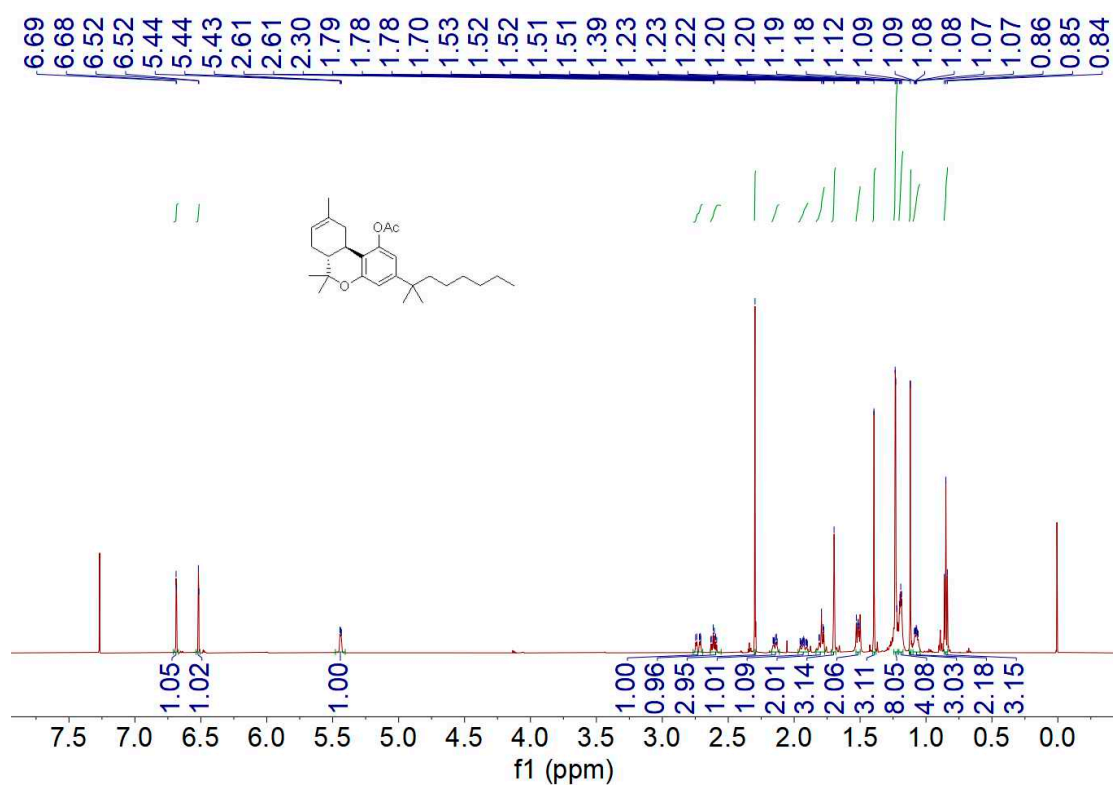

Figure S9 <sup>1</sup>H-NMR of compound **10** (CDCl<sub>3</sub>)

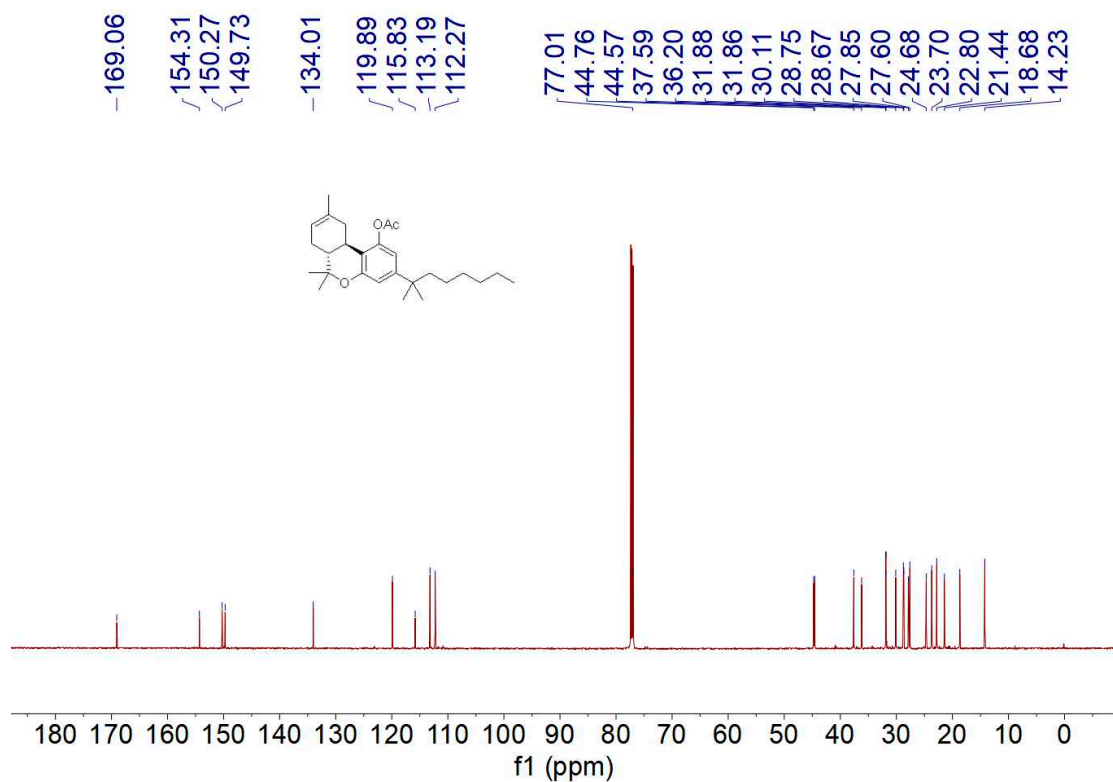

Figure S10 <sup>13</sup>C-NMR of compound **10** (CDCl<sub>3</sub>)

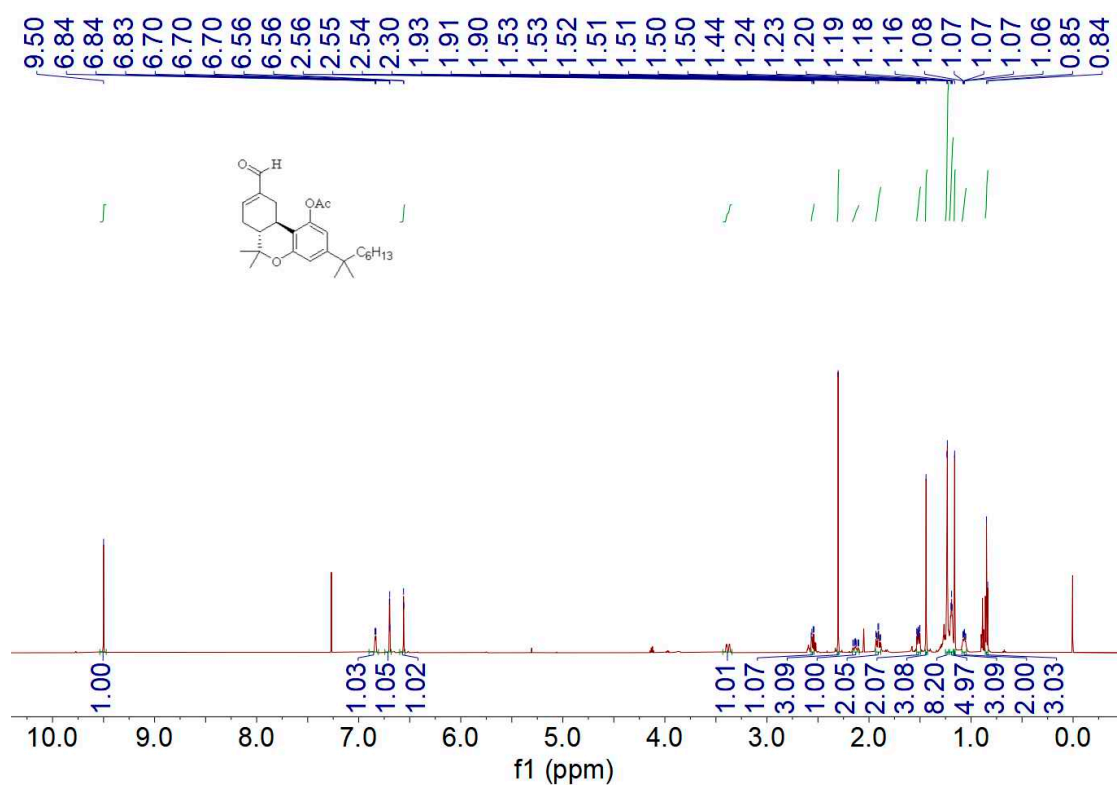

Figure S11 <sup>1</sup>H-NMR of compound 11 (CDCl<sub>3</sub>)

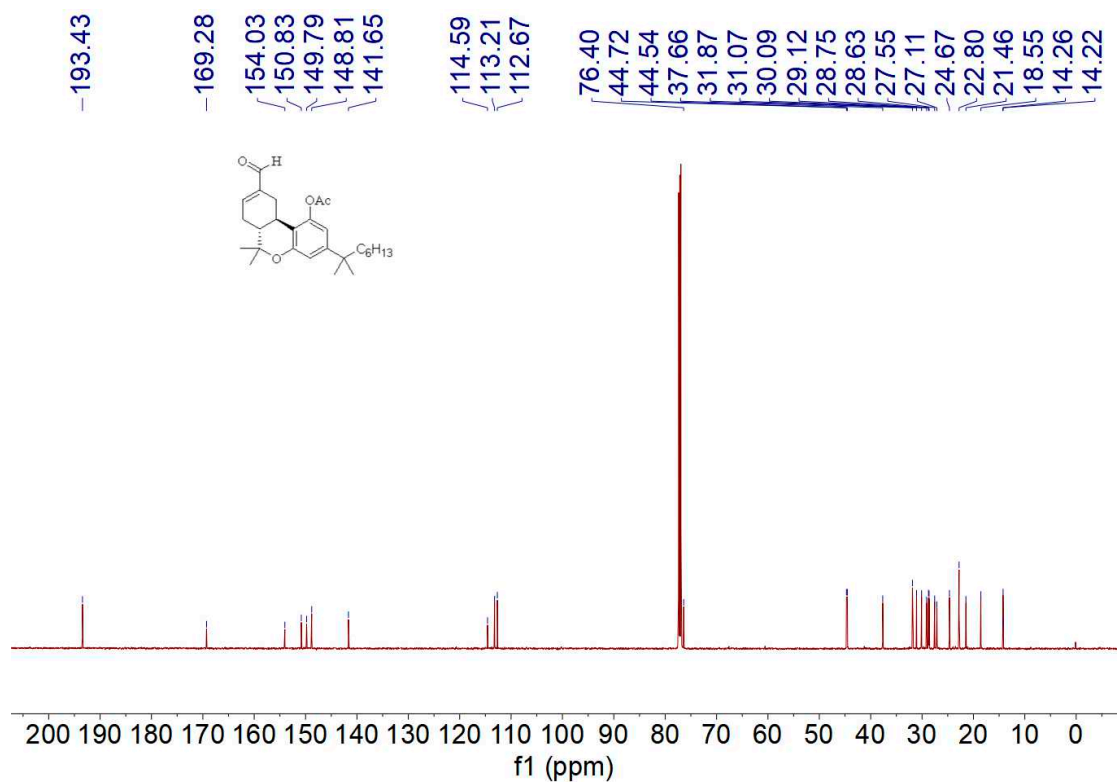

Figure S12 <sup>13</sup>C-NMR of compound 11 (CDCl<sub>3</sub>)

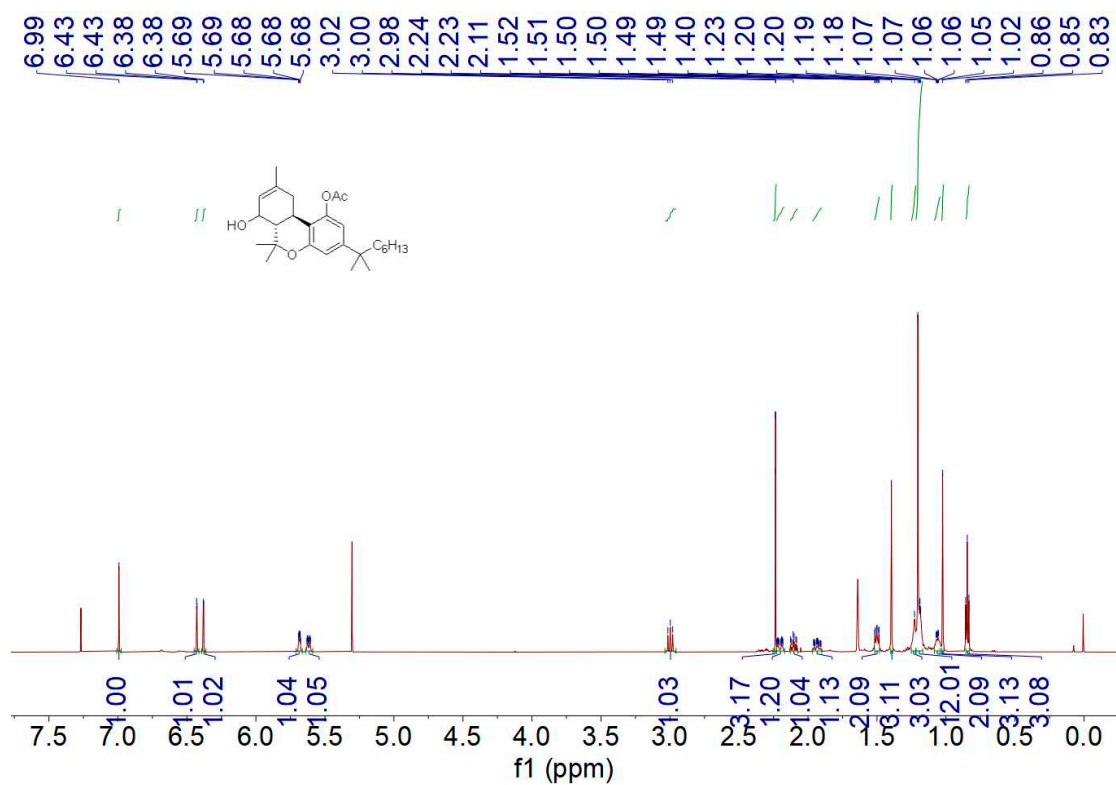

**Figure S13** <sup>1</sup>H-NMR of compound **12** (CDCl<sub>3</sub>)

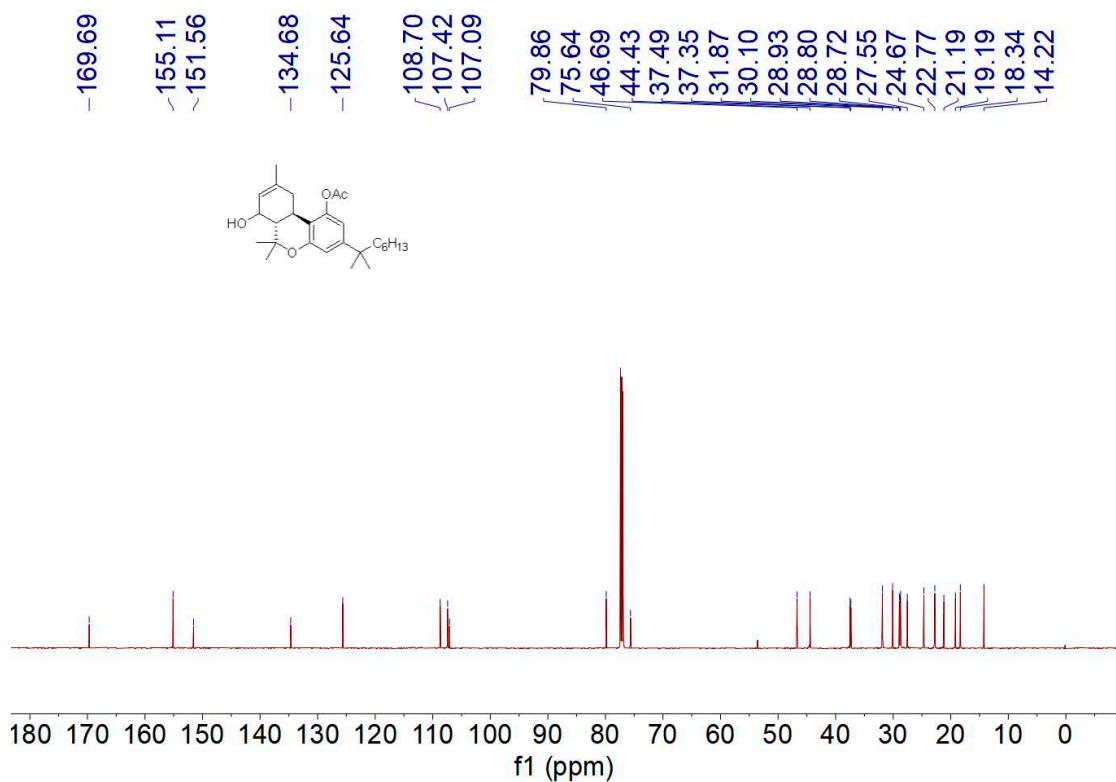

**Figure S14** <sup>13</sup>C-NMR of compound **12** (CDCl<sub>3</sub>)

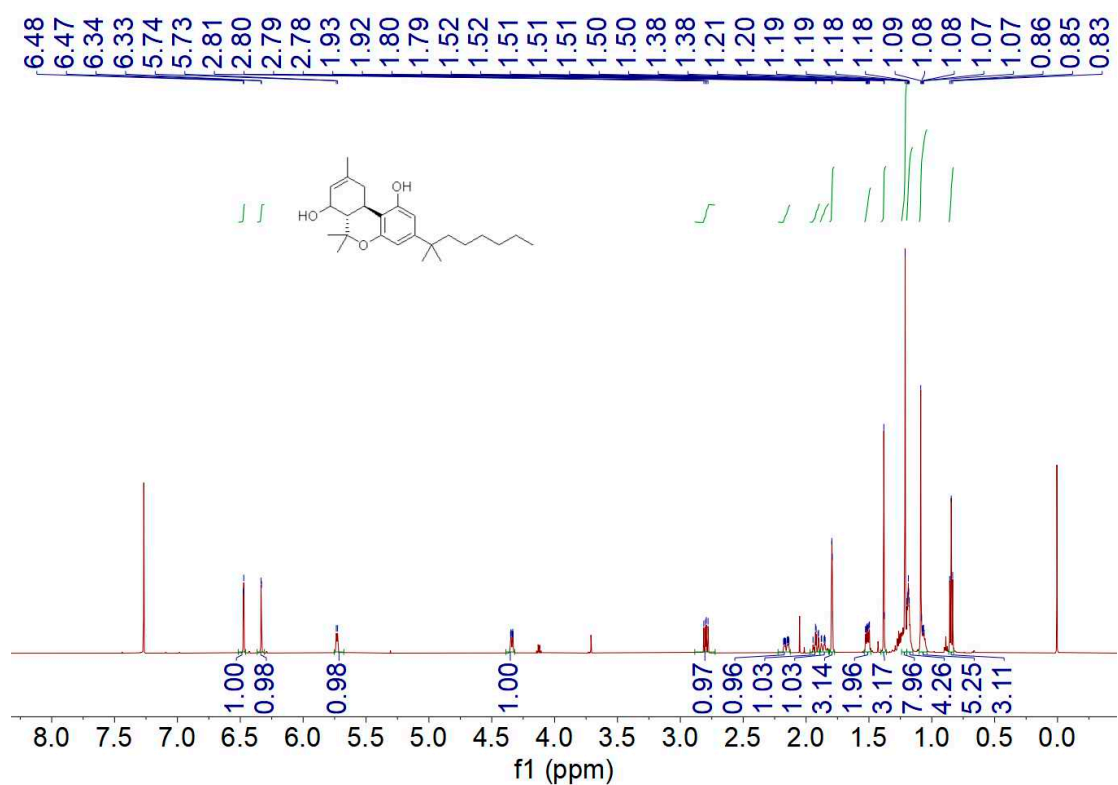

Figure S15  $^1\text{H}$ -NMR of compound **14** ( $\text{CDCl}_3$ )

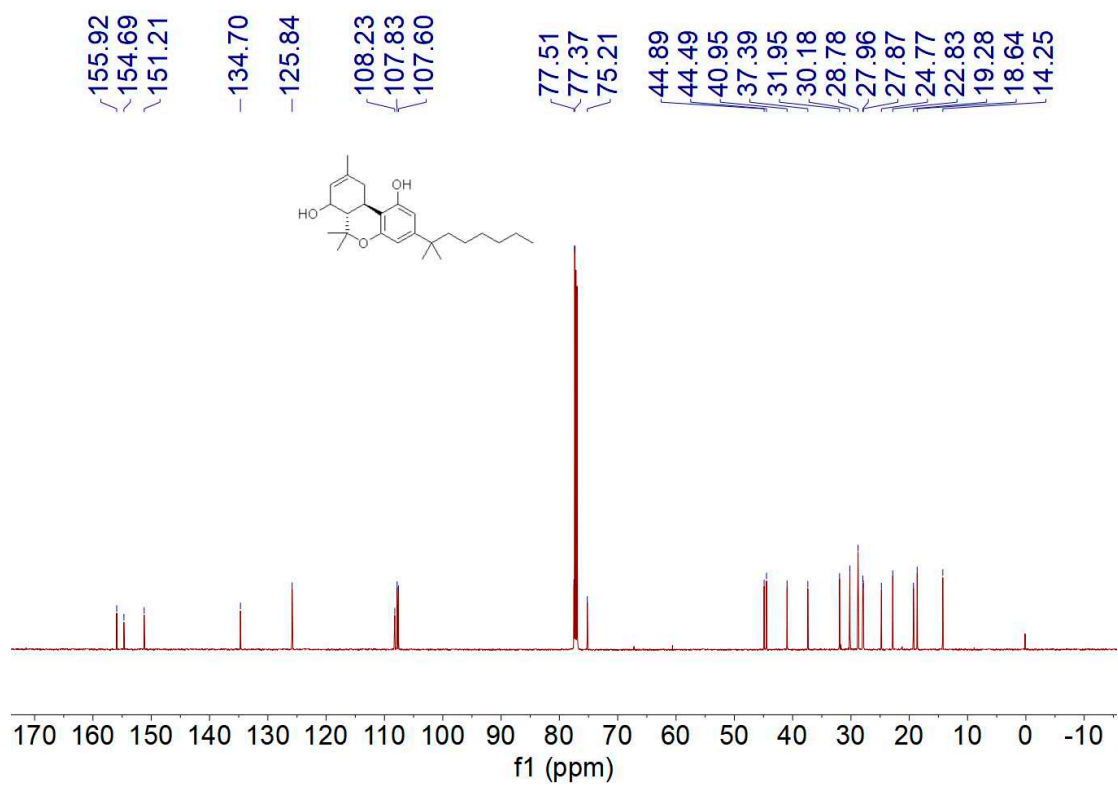

Figure S16  $^{13}\text{C}$ -NMR of compound **14** ( $\text{CDCl}_3$ )

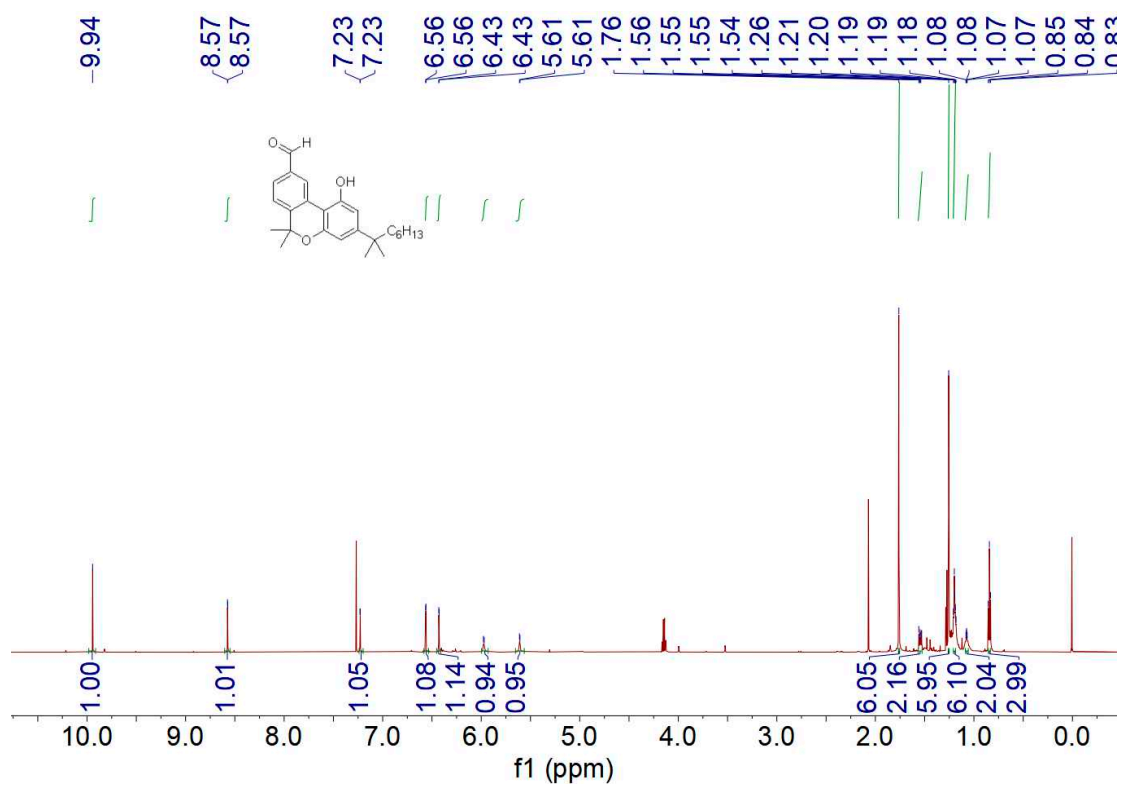

**Figure S17** <sup>1</sup>H-NMR of compound **15** (CDCl<sub>3</sub>)





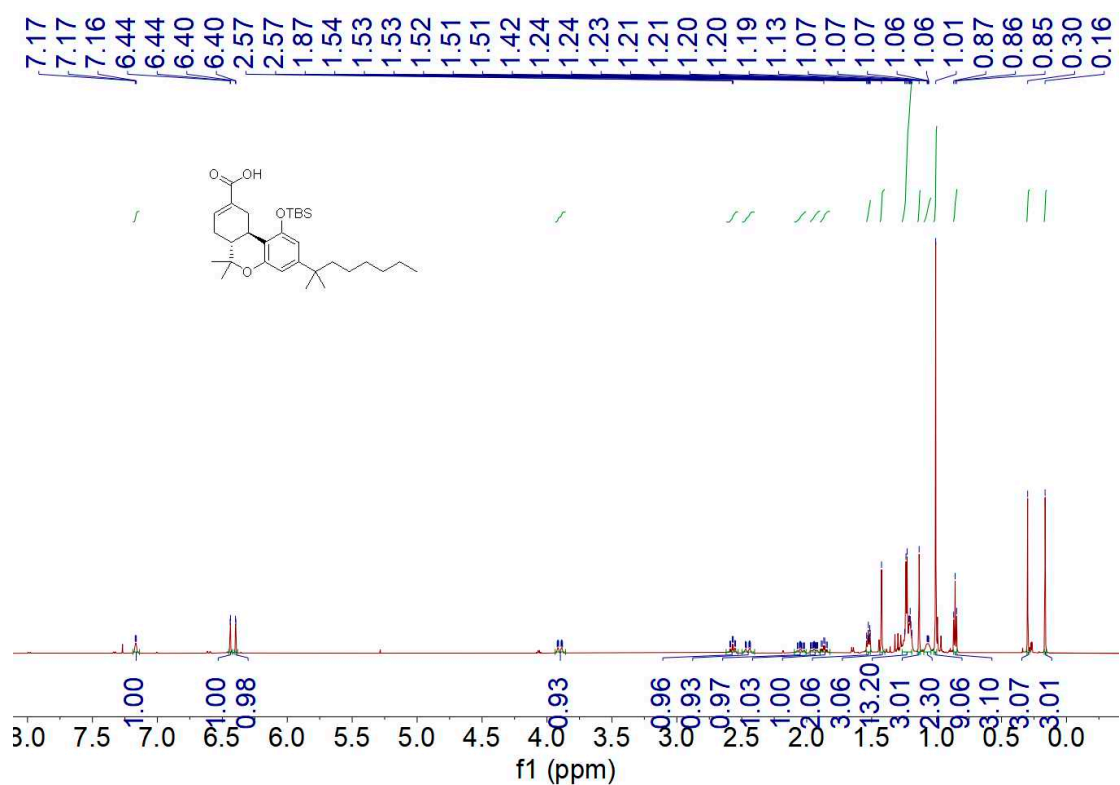

Figure S20 <sup>1</sup>H-NMR of compound **9** (CDCl<sub>3</sub>)

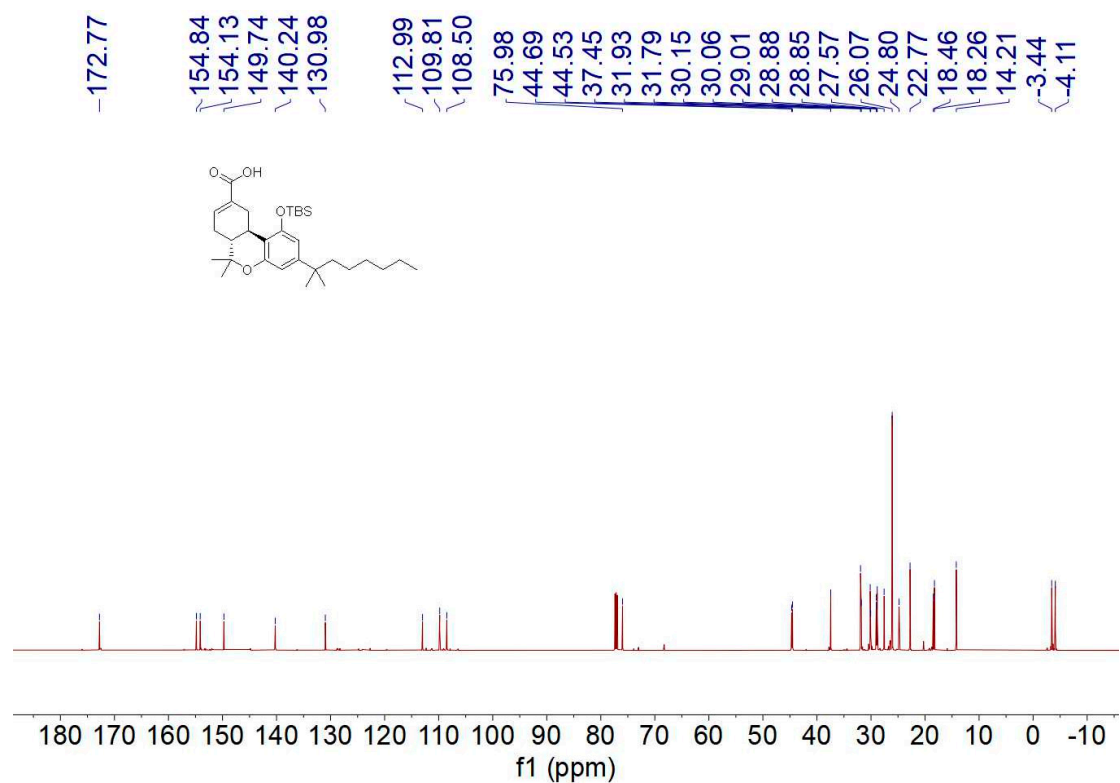

Figure S21 <sup>13</sup>C-NMR of compound **9** (CDCl<sub>3</sub>)



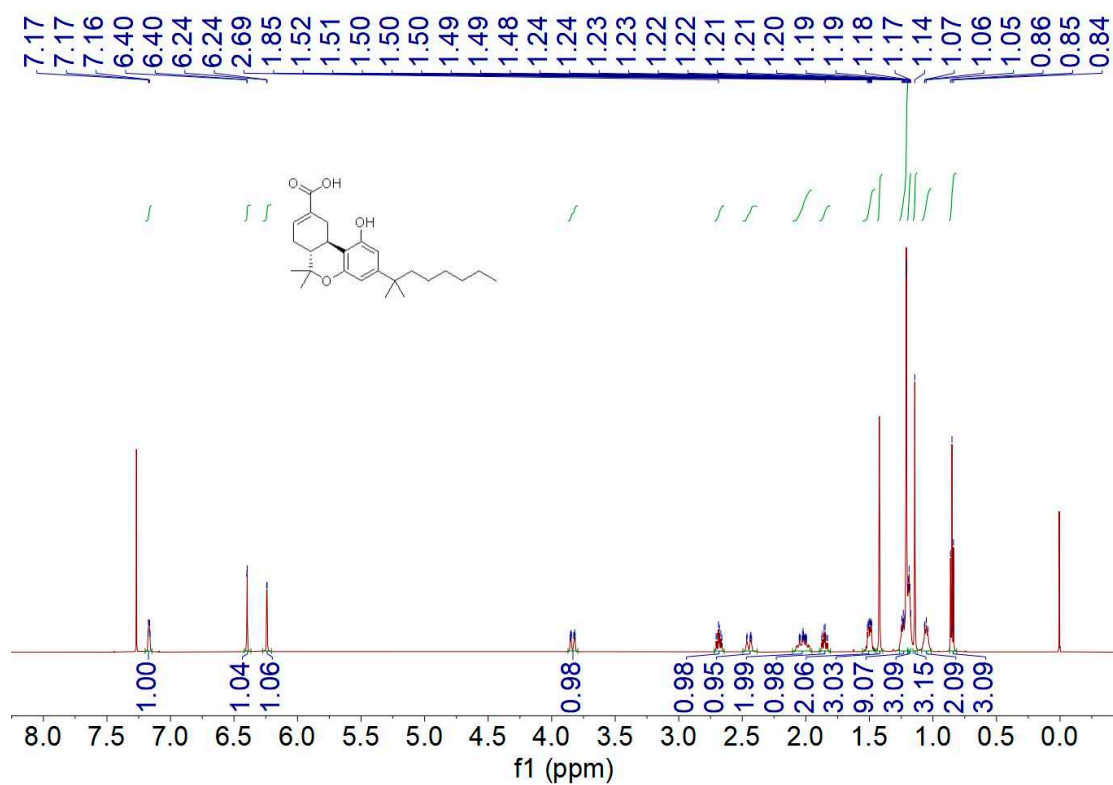

Figure S22  $^1\text{H}$ -NMR of compound 4 ( $\text{CDCl}_3$ )

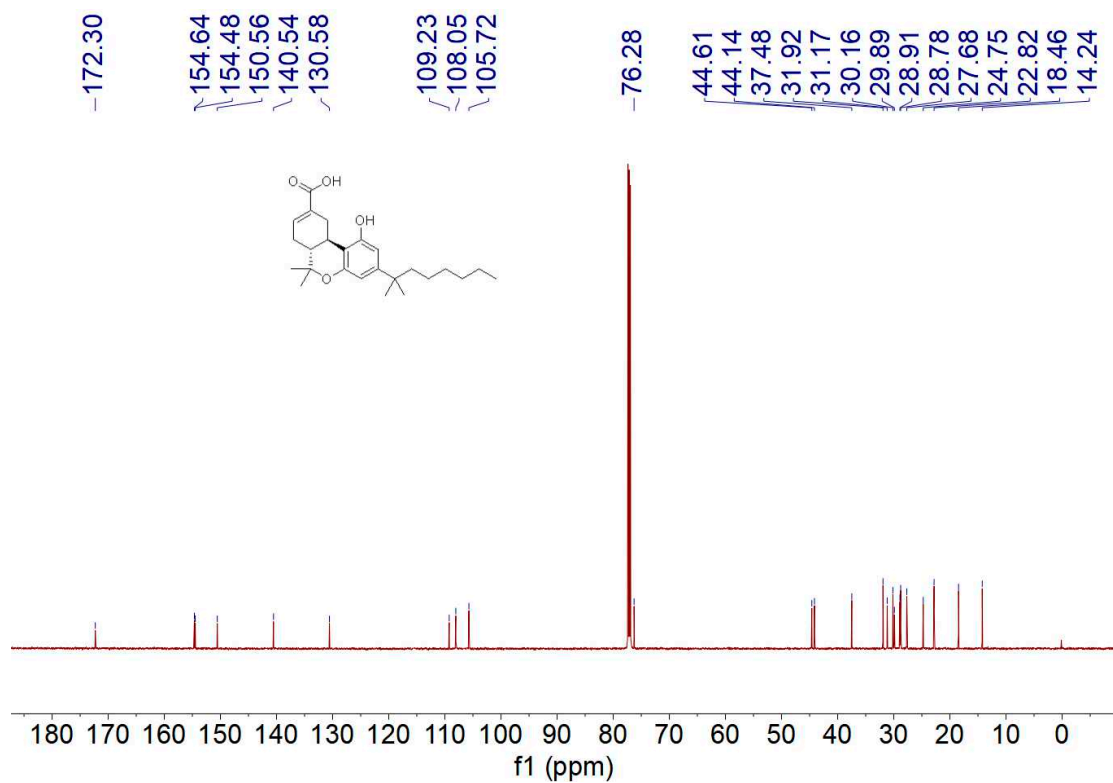

Figure S23  $^{13}\text{C}$ -NMR of compound 4 ( $\text{CDCl}_3$ )

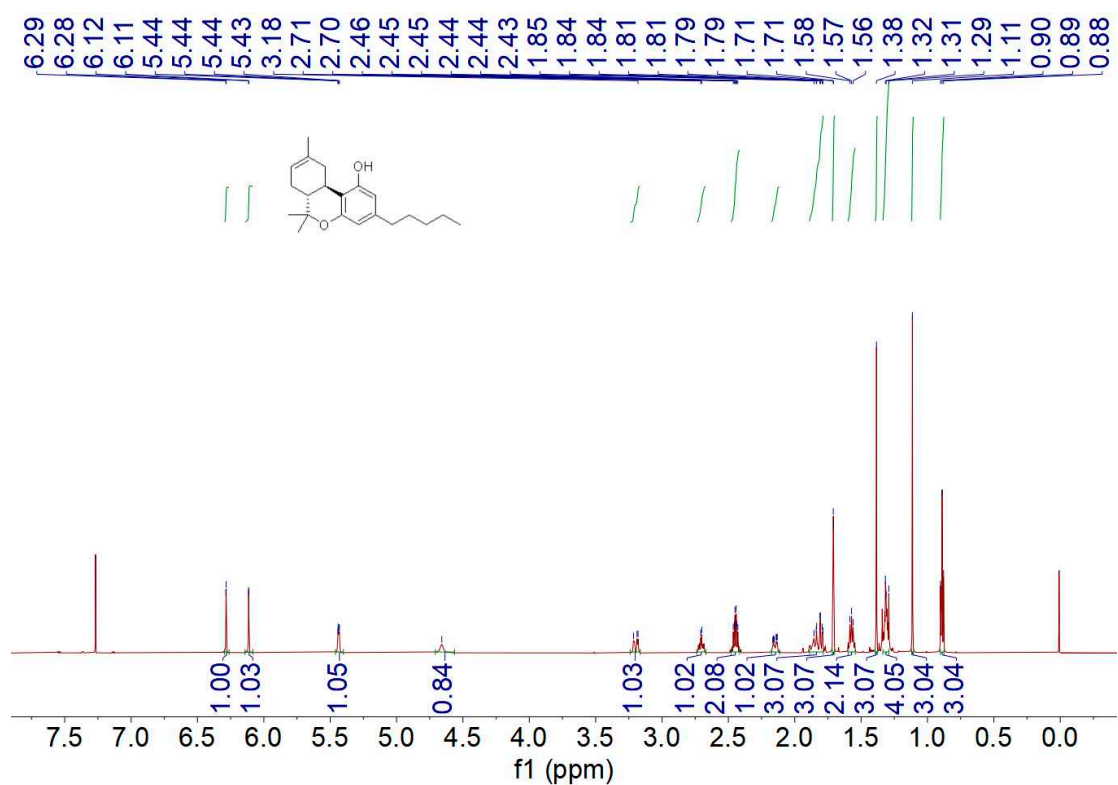

Figure S24  $^1\text{H}$ -NMR of compound  $\Delta^8$ -THC ( $\text{CDCl}_3$ )

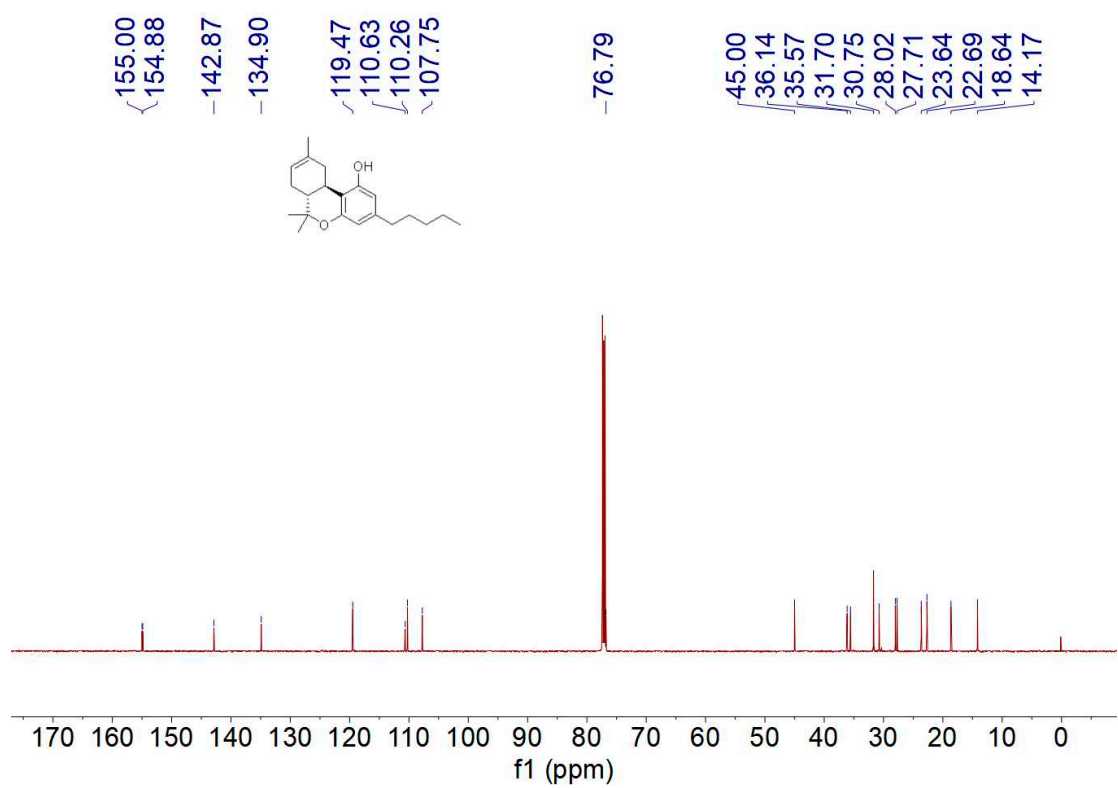

Figure S25  $^{13}\text{C}$ -NMR of compound  $\Delta^8$ -THC ( $\text{CDCl}_3$ )

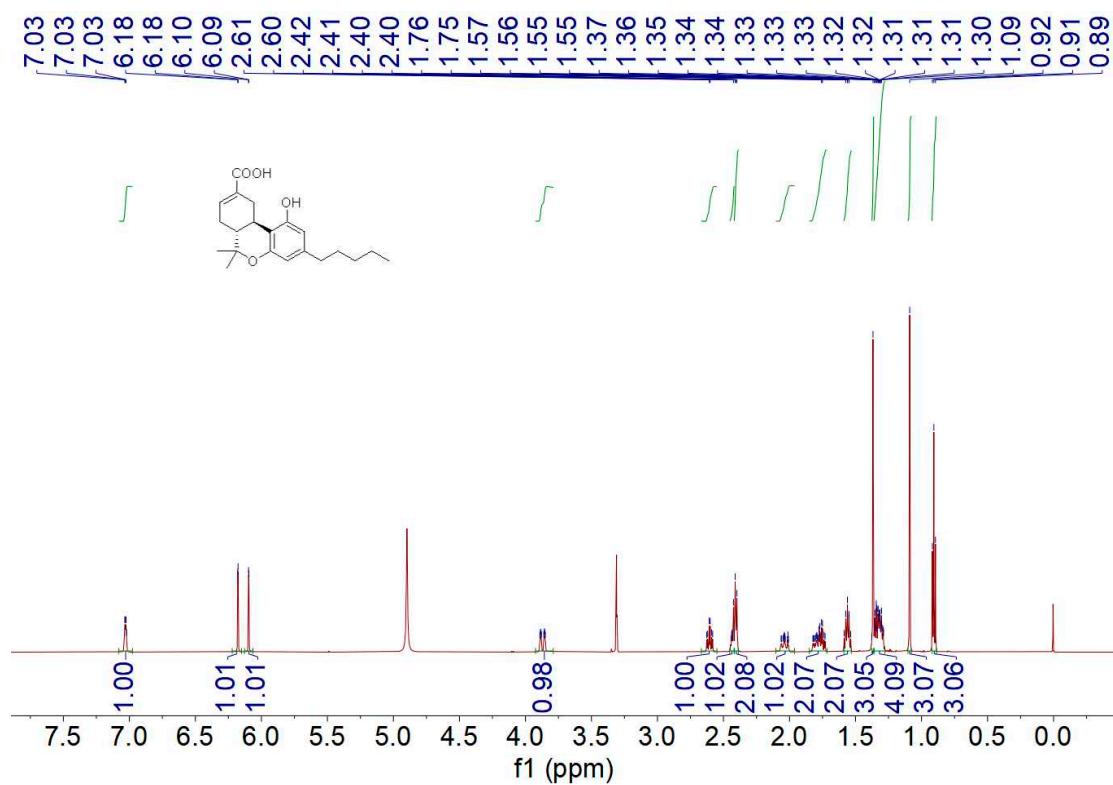

**Figure S26** <sup>1</sup>H-NMR of compound 11- nor- $\Delta^8$ -THC-carboxylic acid (CD<sub>3</sub>OD)

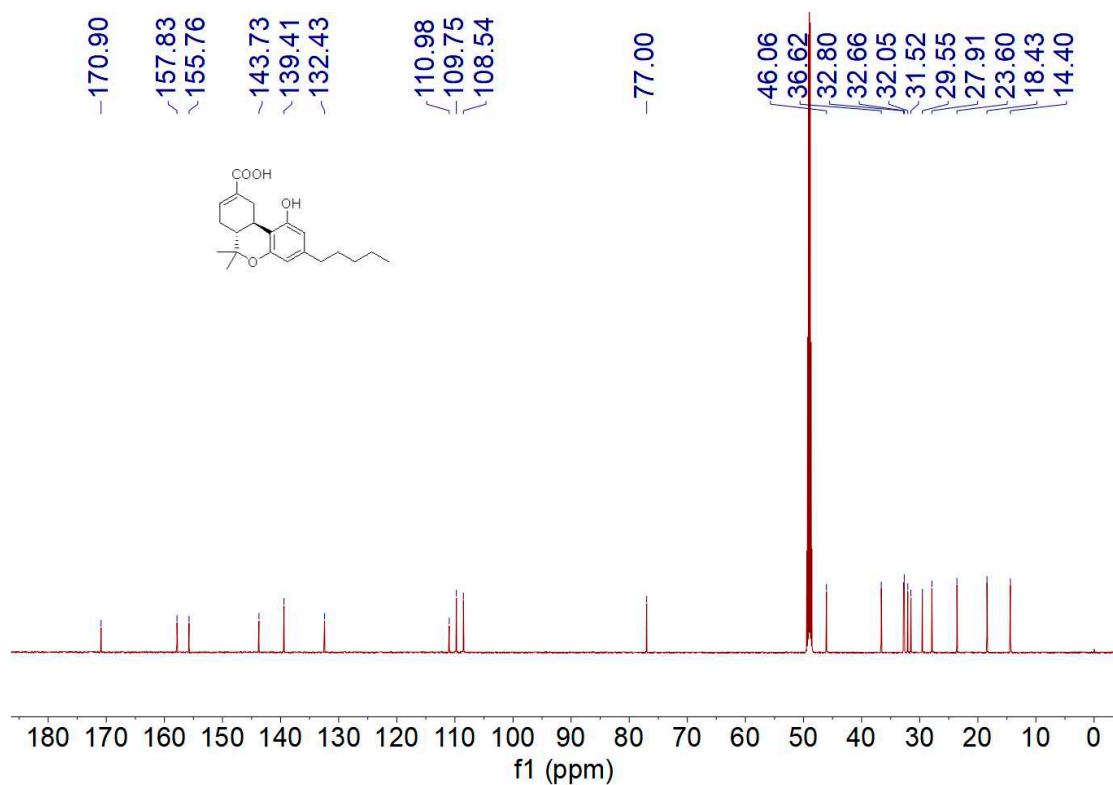

**Figure S27** <sup>13</sup>C-NMR of compound 11-nor- $\Delta^8$ -THC-carboxylic acid (CD<sub>3</sub>OD)

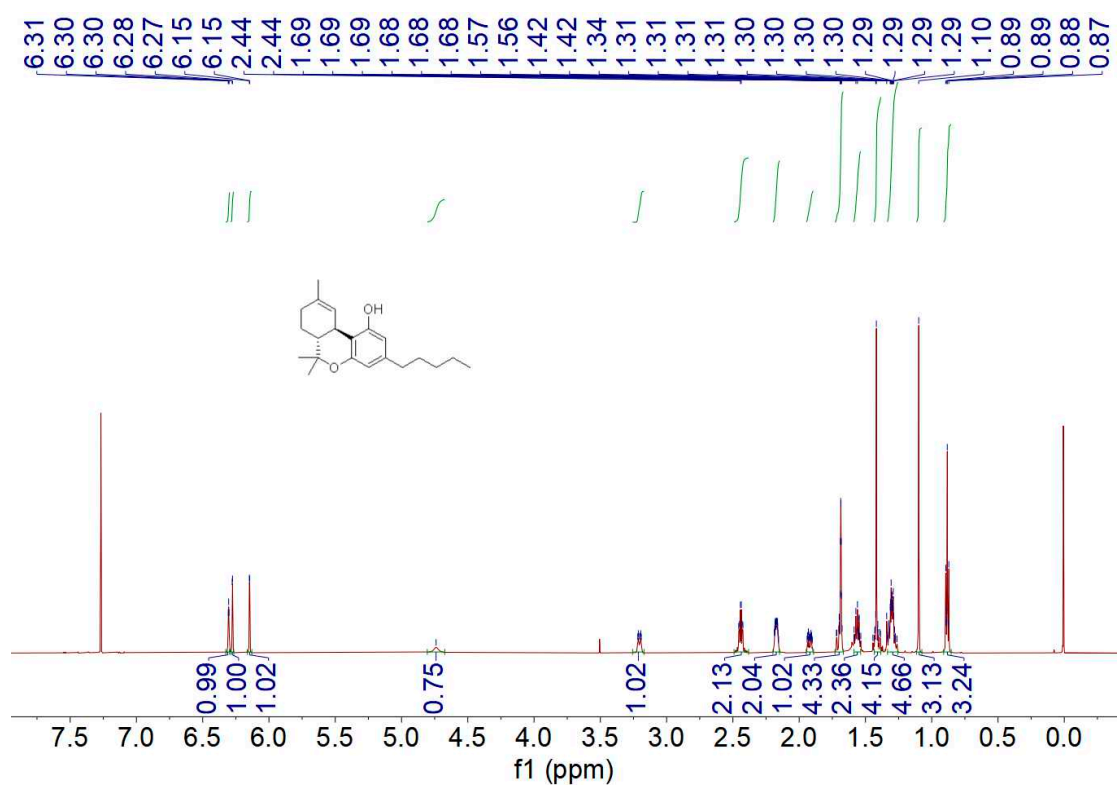

Figure S28  $^1\text{H}$ -NMR of compound  $\Delta^9$ -THC ( $\text{CDCl}_3$ )

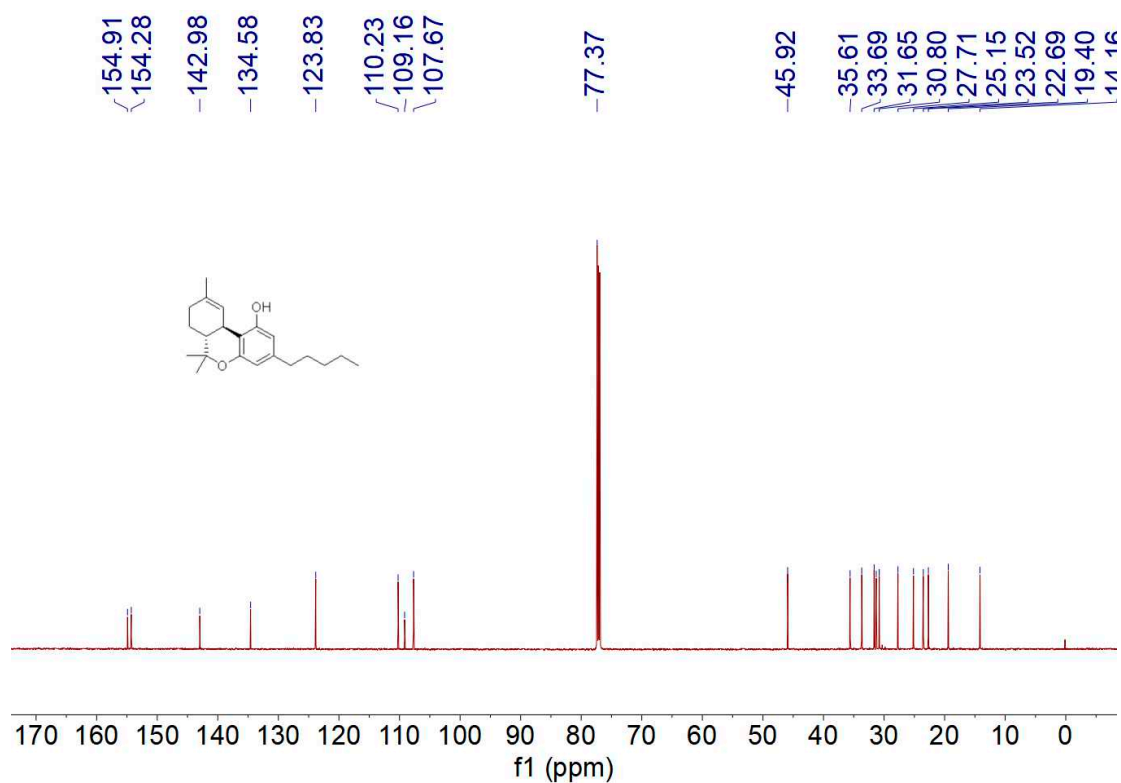

Figure S29  $^{13}\text{C}$ -NMR of compound  $\Delta^9$ -THC ( $\text{CDCl}_3$ )

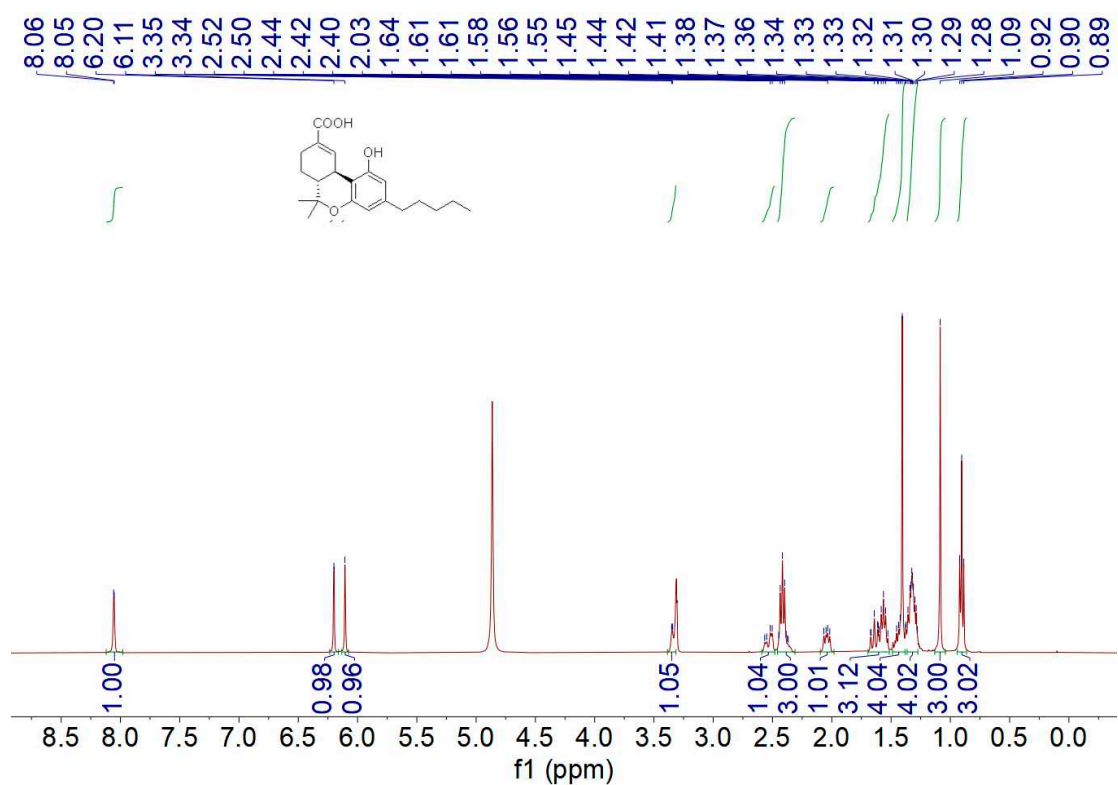

**Figure S30** <sup>1</sup>H-NMR of compound  $\Delta^9$ -THC- carboxylic acid (CDCl<sub>3</sub>)

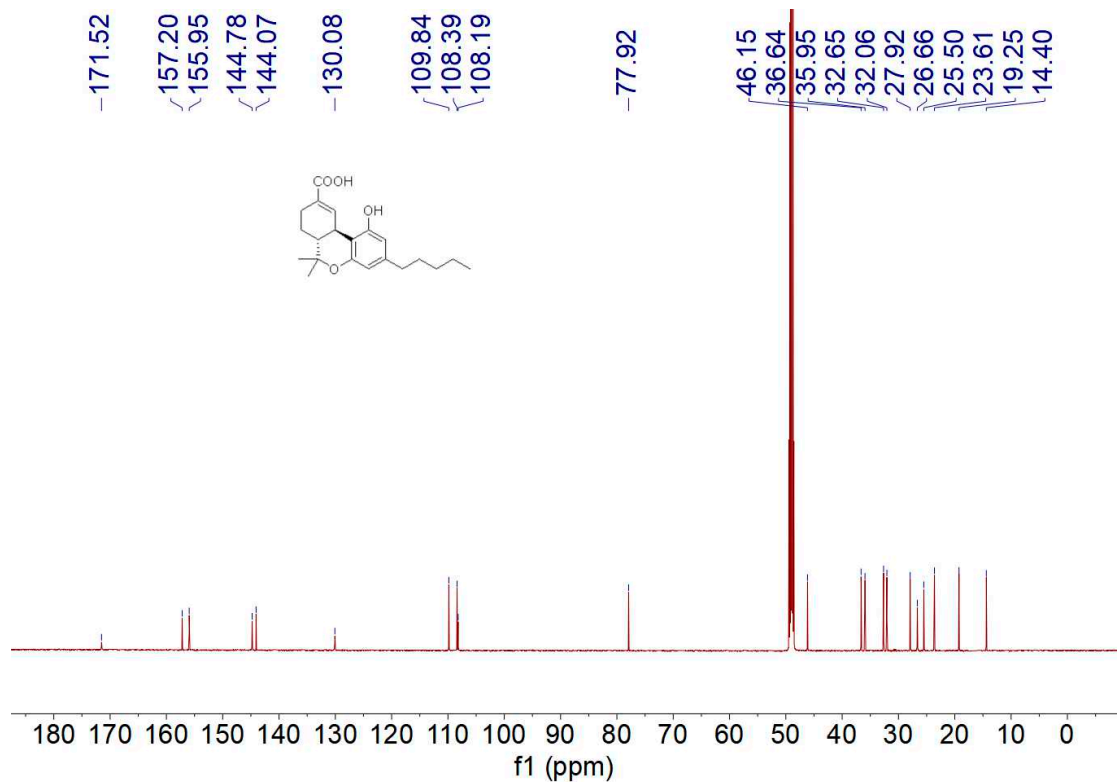

**Figure S31** <sup>13</sup>C-NMR of compound  $\Delta^9$ -THC- carboxylic acid (CDCl<sub>3</sub>)
